# Supplementary material for: Reversal of Osseointegration as a Novel Perspective for the Removal of Failed Dental Implants: A Review of Five Patented Methods
Source: Materials (Basel). 2021 Dec 17;14(24):7829. doi: 10.3390/ma14247829 (PMC8707383; doi:10.3390/ma14247829)
Supplement: Supplementary file 1 [file materials-14-07829-s001.zip]

Archive with 5 entries (5 files):
- P1 (KR) Yonsei University, Korea, Lee English machine translation.pdf
- P2 (US) Bern University, Switzerland, Braegger.pdf
- P3 (KR) Yonsei University, Korea, Lee Korean Original.pdf
- P4 (US) Implaout, Denmark, Petersen.pdf
- P5 (US) Winnen, Germany, Winnen.pdf
